# Supplementary material
Source: PubMed Central journal article supplement (PMC2879758)
Supplement: tpc.110.074088_1.pdf [file tpc.110.074088_1.pdf]

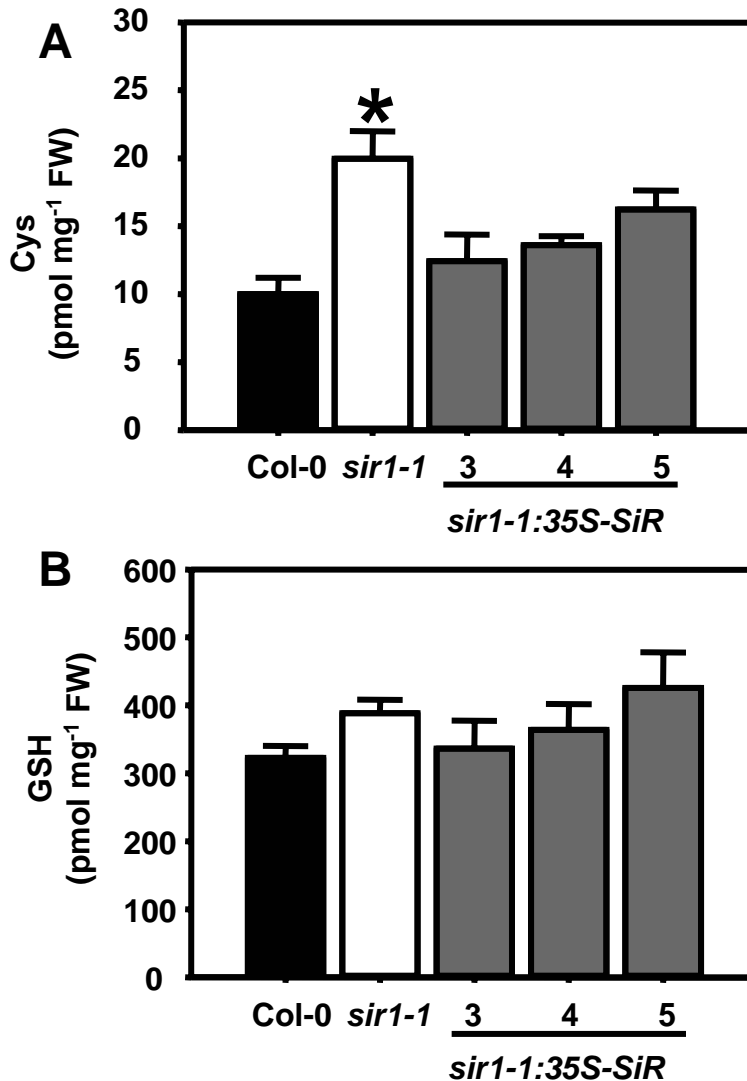

**Supplemental Figure 1: Thiol levels of genetically complemented *sir1-1* plants** (A) Cysteine and (B) Glutathione steady state levels in leaves of 7 week old wild type (black), *sir1-1* (white) and three complemented *sir1-1* lines (gray) grown on soil under short day conditions. Mean  $\pm$  SE (n = 5) are shown. Asterisks indicate statistical significance (P < 0.05). FW, fresh weight

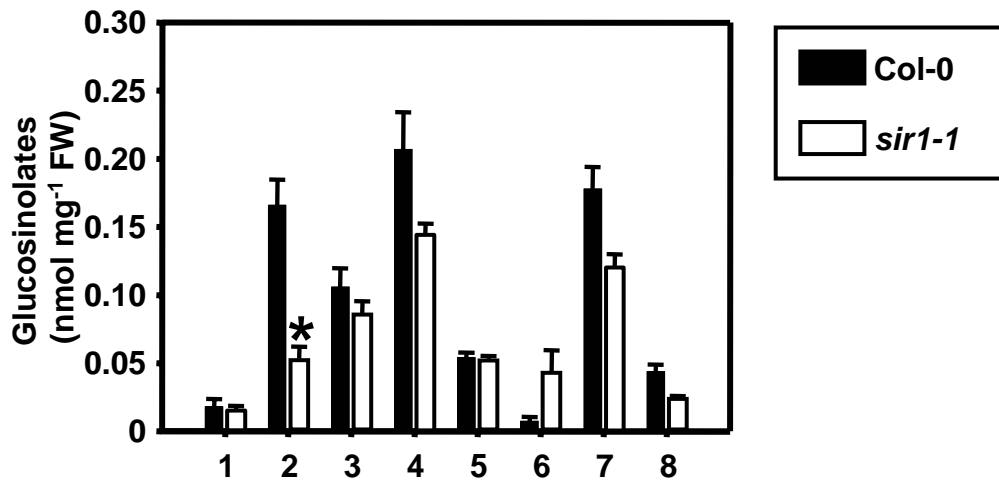

**Supplemental Figure 2: Spectrum of glucosinolates in *sir1-1* plants**

Steady state levels of the major glucosinolates in leaves of 7 week old wild type (black) and *sir1-1* (white) plants grown on soil in a growth chamber under short day conditions. Mean  $\pm$  SE (n = 5) are shown. Asterisks indicate statistical significance (P < 0.05). 1: glucoibarin, 2: glucoeurocin, 3: glucohirsutin, 4: glucobrassicin, 5: 4-methoxy.glucobrassicin, 6: neoglucobrassicin, 7: glucoiberin, 8: glucoalyssin.

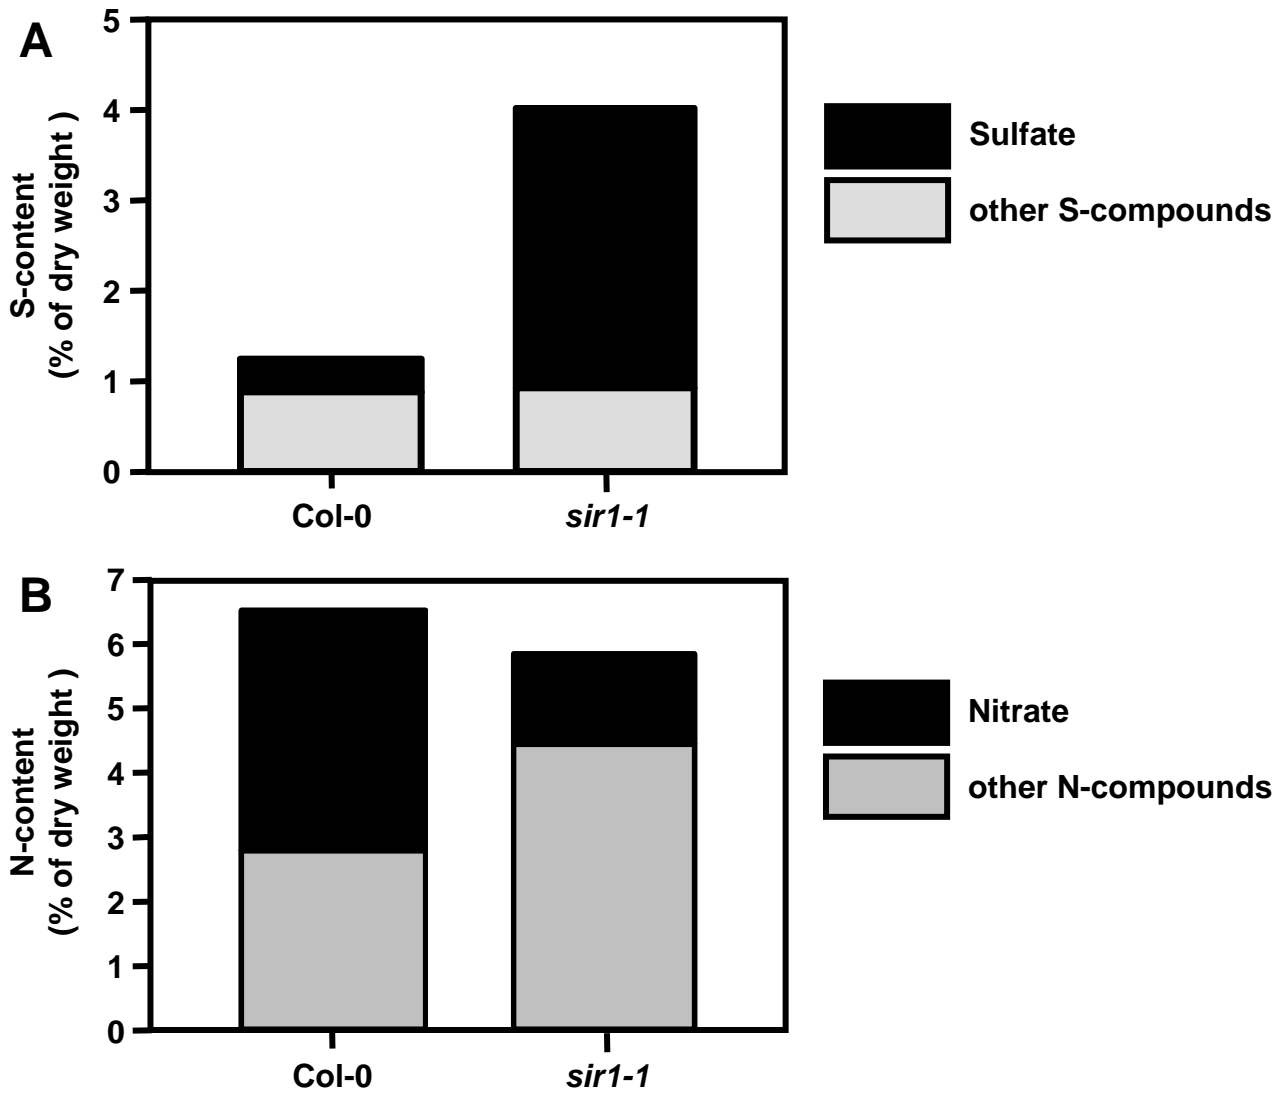

**Supplemental Figure 3: Contribution of anions to total sulfur and nitrogen content**

(A) The Content of sulfate in % of dry weight was calculated on the basis of means of sulfate steady-state levels in leaves of 7 week old plants grown on soil under short day conditions and a ratio of fresh to dry weight of 13.81 for wild type and 13.16 for *sir1-1* plants. (Fig. 4A). The contribution of other S-compounds was calculated by difference of sulfate content to the total content of sulfur in wild type and *sir1-1* (Fig. 4F, n = 5). (B) Same calculation for contribution of nitrate to total content of nitrogen as in A.

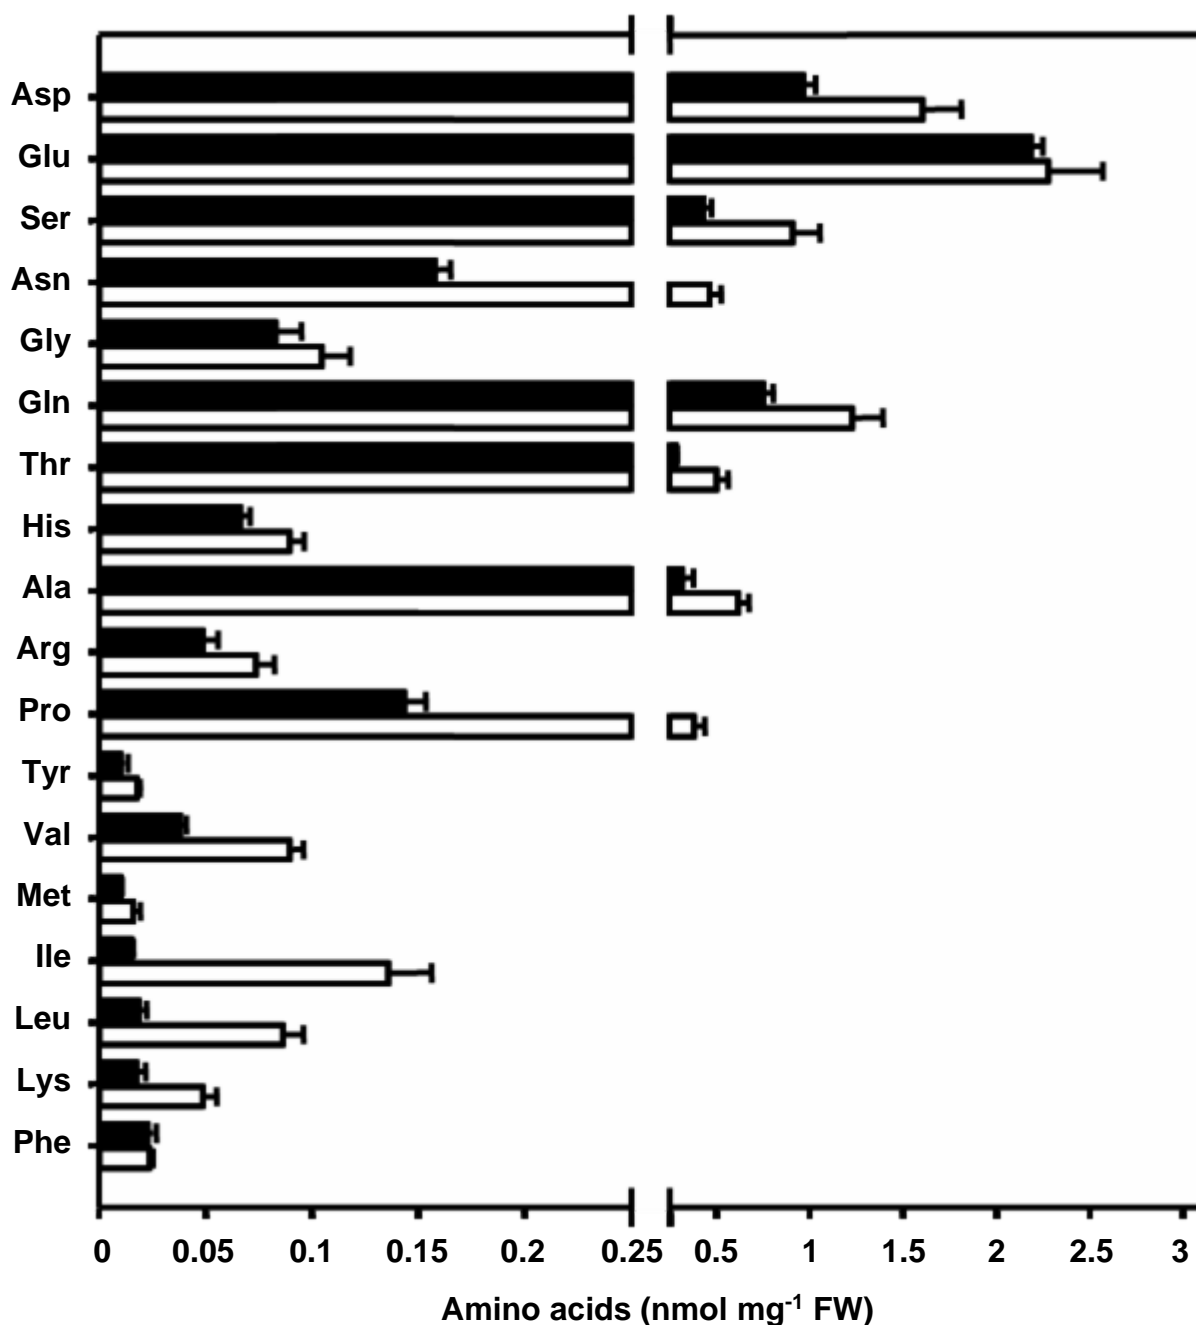

**Supplemental Figure 4: Spectrum of amino acids in *sir1-1* plants**

Steady state levels of amino acids in leaves of 7 week old wild type (black) and *sir1-1* (white) plants grown on soil in a growth chamber under short day conditions. Mean  $\pm$  SE (n = 5) are shown. Asp: aspartic acid, Glu: glutamic acid, Ser: serine, Asn: asparagine, Gly: glycine, Gln: glutamine, Thr: threonine, His: histidine, Ala: alanine, Arg: arginine, Pro: proline, Tyr: tyrosine, Val: valine, Met: methionine, Ile: isoleucine, Leu: leucine, Lys: lysine, Phe: phenylalanine, FW, fresh weight

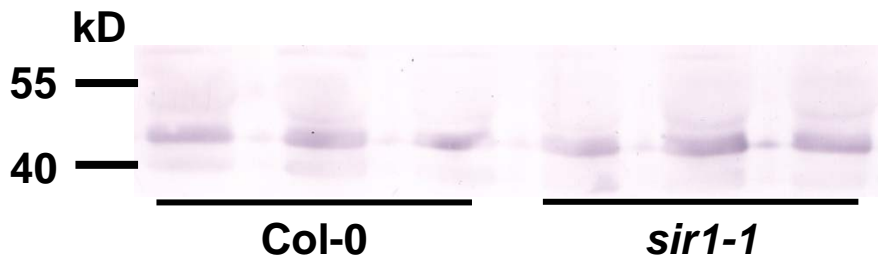

**Supplemental Figure 5: Immunological detection of sulfite oxidase (SO) in *sir1-1* plants**

Soluble proteins were extracted from leaves of 7 week old wild type (Col-0) and *sir1-1* plants grown on soil in a growth chamber under short day conditions (n=3). Total soluble proteins (10  $\mu$ g) were separated by SDS-PAGE (12% acrylamide) and transferred to a nitrocellulose membrane as described in the Methods. The abundance of Sulfite oxidase was tested with a polyclonal antiserum according to Lang et al., (2007).

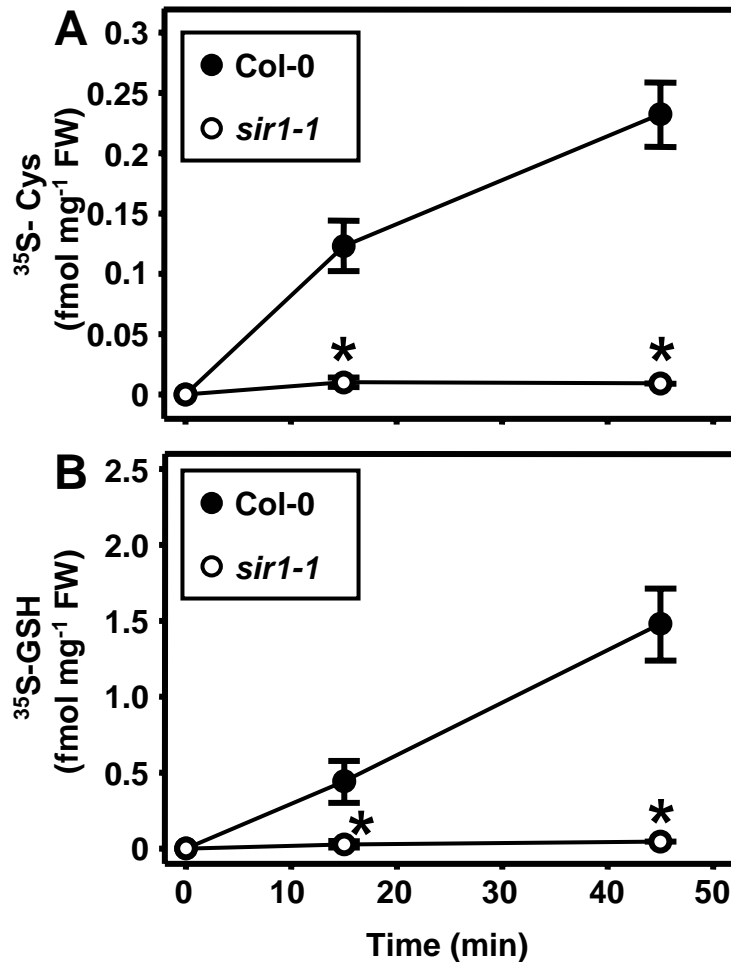

**Supplemental Figure 6: Incorporation rates of sulfate in wild type and *sir1-1* plants grown on soil**

Leaf pieces of 7 week old wild type (black circles) and *sir1-1* (white circles) from plants grown on soil at short day conditions were incubated with  $^{35}\text{SO}_4^{2-}$ -spiked  $\frac{1}{2}$  Hoagland solution for 15 min (pulse) and subsequently kept on the same medium without radiolabel for 30 min (chase). Time point 0 was defined by transfer of leaf pieces to  $^{35}\text{SO}_4^{2-}$ -spiked  $\frac{1}{2}$  Hoagland solution. Samples were taken at indicated time points. (A) Cysteine and (B) GSH were extracted and separated by HPLC. The incorporated  $^{35}\text{S}$ -label was quantified by scintillation counting. The mean  $\pm$  SE from 4 independent extractions of wild type and *sir1-1* are shown. Asterisks indicate statistical significance ( $P < 0.05$ ). FW, fresh weight

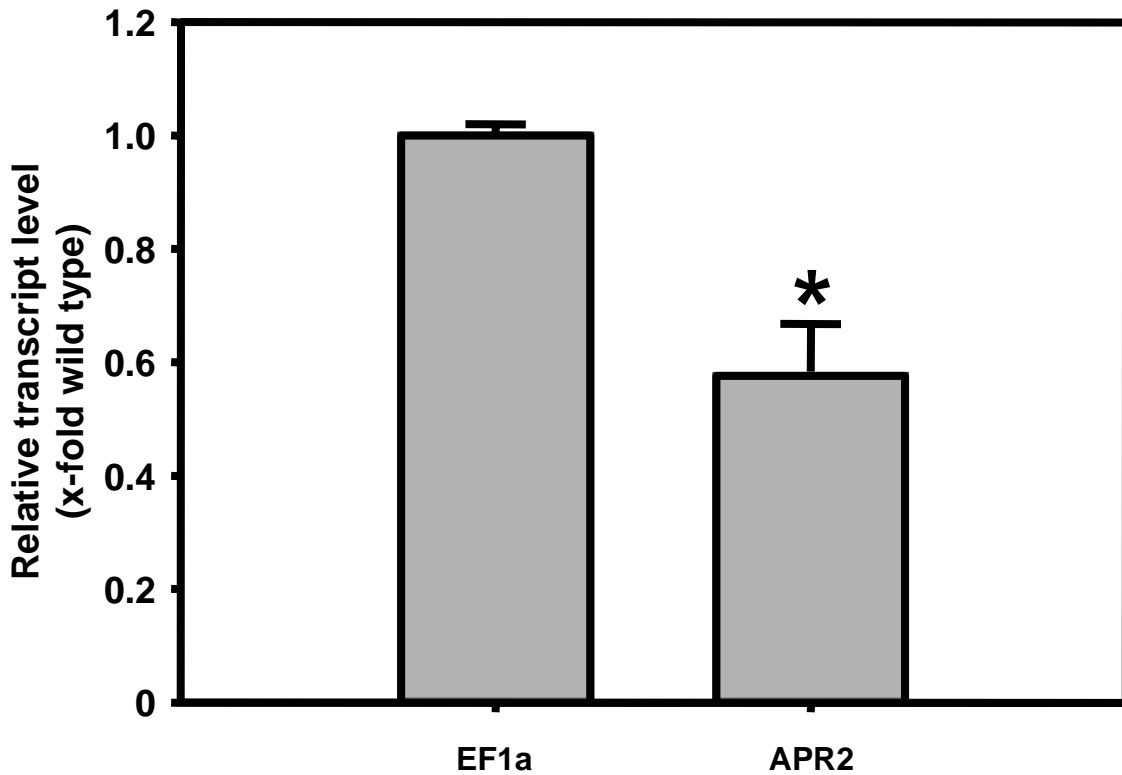

**Supplemental Figure 7: Transcript levels of *APR2* in *sir1-1* determined by qRT-PCR**

Total mRNA was extracted from leaves of *sir1-1* and wild type plants grown on soil under short day conditions for 7 weeks ( $n = 3$ ) and analysed for transcript levels of *APR2* by qRT-PCR as described in the Methods. Ef1a served as reference. Means  $\pm$  SE are shown. Asterisks indicate statistically significant differences.

Supplemental Data. Khan et al. Plant Cell. (2010). 10.1105/tpc.110.074088

| MIPs code | NCBI GeneID:   | Identity, description                 | Category               | median fitted data Col-0 | median fitted data sir | Change | Change in % of wild type | P-value |
|-----------|----------------|---------------------------------------|------------------------|--------------------------|------------------------|--------|--------------------------|---------|
| At3g19710 | GeneID:821508  | branched-chain amino transferase      | Glucosinolat-synthesis | 5594                     | 9639                   | 1,72   | 172,0                    | 0,004   |
| At5g25980 | GeneID:832667  | myrosinase                            | Glucosinolat-synthesis | 35276                    | 56689                  | 1,61   | 161,0                    | 0,031   |
| At5g26000 | GeneID:832669  | myrosinase                            | Glucosinolat-synthesis | 5726                     | 9084                   | 1,59   | 159,0                    | 0,004   |
| At4g13770 | GeneID:827011  | cytochrom P450                        | Glucosinolat-synthesis | 7864                     | 12020                  | 1,53   | 153,0                    | 0,022   |
| At1g16400 | GeneID:838210  | cytochrom P450, CYP79F2               | Glucosinolat-synthesis | 2083                     | 2957                   | 1,42   | 142,0                    | 0,022   |
| At4g03060 | GeneID:828102  | AOP2                                  | Glucosinolat-synthesis | 1948                     | 2476                   | 1,27   | 127,0                    | 0,006   |
| At1g24100 | GeneID:839022  | glucosyl transferase                  | Glucosinolat-synthesis | 3025                     | 3591                   | 1,19   | 119,0                    | 0,016   |
| At1g54040 | GeneID:841842  | epithiospecifier protein,             | Glucosinolat-synthesis | 2408                     | 2751                   | 1,14   | 114,0                    | 0,03    |
| At2g22330 | GeneID:816765  | cytochrome P450 CYP79B3               | Glucosinolat-synthesis | 1627                     | 1829                   | 1,12   | 112,0                    | 0,04    |
| At3g56060 | GeneID:824772  | mandelonitrile lyase-like protein     | Glucosinolat-synthesis | 3126                     | 2400                   | -1,3   | 54,3                     | 0,034   |
| At5G63980 | GeneID:836519  | PAPS Phosphatase                      | Sulfur-metabolism      | 3942                     | 5354                   | 1,36   | 136,0                    | 0,038   |
| AT3G22740 | GeneID:821845  | AtHMT-3                               | Sulfur-metabolism      | 1580                     | 1937                   | 1,23   | 123,0                    | 0,03    |
| At4G01850 | GeneID:826987  | SAM2                                  | Sulfur-metabolism      | 5572                     | 6779                   | 1,22   | 122,0                    | 0,033   |
| At1g62180 | GeneID:842514  | APR2                                  | Sulfur-metabolism      | 6278                     | 5390                   | -1,16  | 86,2                     | 0,034   |
| At5g65720 | GeneID:836701  | cysteine desulhydrilase               | Sulfur-metabolism      | 3258                     | 2731                   | -1,19  | 84,0                     | 0,043   |
| At5g44070 | GeneID:834430  | Phytochelatinsynthase                 | Sulfur-metabolism      | 4958                     | 4081                   | -1,21  | 82,6                     | 0,032   |
| AT3G56300 | GeneID:824797  | Cysteinyl-tRNA synthetase             | Sulfur-metabolism      | 37265                    | 29949                  | -1,24  | 80,6                     | 0,048   |
| At5g10180 | GeneID:830882  | Sultr2;1                              | Sulfur-metabolism      | 3738                     | 2728                   | -1,37  | 73,0                     | 0,018   |
| AT1G13420 | GeneID:837902  | Sulfotransferase family protein       | Sulfur-metabolism      | 12743                    | 8940                   | -1,43  | 69,9                     | 0,03    |
| At5g43780 | GeneID:834400  | APS4                                  | Sulfur-metabolism      | 3554                     | 1932                   | -1,84  | 54,3                     | 0,003   |
| AT5G04590 | GeneID:830336  | SIR                                   | Sulfur-metabolism      | 16134                    | 5008                   | -3,22  | 31,1                     | 0       |
| AT2G25450 | GeneID:817083  | similar to ACC oxidase                | Sulfur-induced         | 6902                     | 11797                  | 1,71   | 171,0                    | 0,036   |
| AT4G12470 | GeneID:826859  | lipid transfer protein family protein | Sulfur-induced         | 3877                     | 3121                   | -1,24  | 80,6                     | 0,014   |
| ATCG01270 | GeneID:6686170 | chloroplast encoded hypothetical prot | Sulfur-induced         | 15366                    | 9567                   | -1,6   | 62,5                     | 0,042   |
| At5g24770 | GeneID:832546  | VEGETATIVE STORAGE PROTEIN 2          | Sulfur-induced         | 2675                     | 30425                  | 11,37  | 1137,0                   | 0,001   |
| At5g24780 | GeneID:832547  | VEGETATIVE STORAGE PROTEIN 1          | Sulfur-induced         | 2104                     | 18883                  | 8,98   | 898,0                    | 0,001   |
| At2g47880 | GeneID:819400  | Glutaredoxin                          | REDOX                  | 2618                     | 4220                   | 1,61   | 161,0                    | 0,032   |
| At2g03980 | GeneID:814924  | hydrolase family protein              | REDOX                  | 2887                     | 3421                   | 1,18   | 118,0                    | 0,034   |
| At2g32880 | GeneID:817849  | MATH domain-containing protein        | REDOX                  | 2032                     | 2324                   | 1,14   | 114,0                    | 0,03    |
| At4g23150 | GeneID:828414  | pad2 regulateded                      | REDOX                  | 1753                     | 1587                   | -1,1   | 90,9                     | 0,047   |
| At2g43570 | GeneID:818959  | chitinase                             | REDOX                  | 3112                     | 2681                   | -1,16  | 86,2                     | 0,025   |
| At1g03680 | GeneID:839436  | Thioredoxin                           | REDOX                  | 21720                    | 18502                  | -1,17  | 85,5                     | 0,038   |
| At3g54660 | GeneID:824631  | Glutathione Reductase I               | REDOX                  | 7168                     | 6124                   | -1,17  | 85,5                     | 0,039   |
| At5g63030 | GeneID:836423  | Glutaredoxin                          | REDOX                  | 3430                     | 2900                   | -1,18  | 84,7                     | 0,03    |
| At2g05380 | GeneID:815086  | glycine-rich protein                  | REDOX                  | 19826                    | 16057                  | -1,23  | 81,3                     | 0,012   |
| At2g29580 | GeneID:817507  | zinc finger family protein            | REDOX                  | 4009                     | 3118                   | -1,29  | 77,5                     | 0,018   |
| At4g31870 | GeneID:829316  | AtGpx7                                | REDOX                  | 9410                     | 7139                   | -1,32  | 75,8                     | 0,017   |
| At5g06290 | GeneID:830517  | 2-Cys Prx B                           | REDOX                  | 42866                    | 31255                  | -1,37  | 73,0                     | 0,004   |
| AT2G41680 | GeneID:818766  | dihydropolyl dehydrogenase            | REDOX                  | 12743                    | 8940                   | -1,43  | 69,9                     | 0,03    |
| At3g11630 | GeneID:820335  | 2-Cys Prx A                           | REDOX                  | 33458                    | 23286                  | -1,44  | 69,4                     | 0,027   |
| At4g03520 | GeneID:825653  | Thioredoxin                           | REDOX                  | 19556                    | 13243                  | -1,48  | 67,6                     | 0,022   |
| AT3G25250 | GeneID:822119  | OXI1                                  | REDOX                  | 2742                     | 1716                   | -1,6   | 62,5                     | 0,022   |
| At2g14610 | GeneID:815949  | PR1                                   | REDOX                  | 2742                     | 1716                   | -1,6   | 62,5                     | 0,022   |
| At3g57260 | GeneID:824893  | PR2                                   | REDOX                  | 18484                    | 10710                  | -1,73  | 57,8                     | 0,004   |
| At2g44290 | GeneID:819037  | Lipid transfer protein                | REDOX                  | 6112                     | 3441                   | -1,78  | 56,2                     | 0,004   |
| At2g29450 | GeneID:817494  | ATGST U5                              | GSH-Transfer           | 4869                     | 7458                   | 1,53   | 153,0                    | 0,035   |
| At2g02930 | GeneID:814822  | putative glutathione S-transferase    | GSH-Transfer           | 3718                     | 2873                   | -1,29  | 77,5                     | 0,024   |
| At2g25080 | GeneID:817046  | putative glutathione peroxidase AtGpx | GSH-Transfer           | 13950                    | 9001                   | -1,55  | 64,5                     | 0,021   |
| At4g02520 | GeneID:827931  | ATGST F2                              | GSH-Transfer           | 33328                    | 15340                  | -2,17  | 46,1                     | 0,009   |
| AT1G19670 | GeneID:838554  | Chlorophyllase                        | pathogens-related      | 6112                     | 13274                  | 2,17   | 217,0                    | 0,002   |
| At1g66100 | GeneID:842924  | THI1.1                                | pathogens-related      | 3790                     | 5138                   | 1,36   | 136,0                    | 0,038   |
| AT2G06050 | GeneID:815160  | OPR3                                  | pathogens-related      | 2692                     | 3296                   | 1,22   | 122,0                    | 0,011   |
| At1g72260 | GeneID:843558  | THI2.1                                | pathogens-related      | 1486                     | 1767                   | 1,19   | 119,0                    | 0,031   |
| AT5G13160 | GeneID:831155  | AVRPPHB SUSCEPTIBLE 1                 | pathogens-related      | 2697                     | 2342                   | -1,15  | 87,0                     | 0,038   |
| AT1G59870 | GeneID:842281  | ATP binding cassette transporter      | pathogens-related      | 21777                    | 15576                  | -1,4   | 71,4                     | 0,024   |
| AT3G20770 | GeneID:821625  | ETHYLENE-INSENSITIVE3                 | pathogens-related      | 9919                     | 6722                   | -1,48  | 67,6                     | 0,007   |
| AT4G16860 | GeneID:827395  | RPP4                                  | pathogens-related      | 7455                     | 4951                   | -1,51  | 66,2                     | 0,009   |
| AT3G44480 | GeneID:823573  | RPP10                                 | pathogens-related      | 6297                     | 4170                   | -1,51  | 66,2                     | 0,025   |
| AT4G16950 | GeneID:827403  | RPP5                                  | pathogens-related      | 16675                    | 10827                  | -1,54  | 64,9                     | 0,012   |
| AT1G75040 | GeneID:843842  | PR5                                   | pathogens-related      | 6586                     | 4134                   | -1,59  | 62,9                     | 0,006   |
| At5g18170 | GeneID:831935  | glutamate dehydrogenase               | amino acid synthesis   | 3356                     | 2820                   | -1,19  | 84,0                     | 0,022   |
| At5g05730 | GeneID:830457  | ASA1                                  | amino acid synthesis,  | 4182                     | 3420                   | -1,22  | 82,0                     | 0,033   |
| At4g39540 | GeneID:830108  | shikimate kinase - like protein       | amino acid synthesis   | 3686                     | 2922                   | -1,26  | 79,4                     | 0,033   |
| AT3G44300 | GeneID:823555  | nitrilase                             | Auxin-Biosynthese      | 6014                     | 9007                   | 1,5    | 150,0                    | 0,006   |
| AT5G15230 | GeneID:831375  | gibberellin-regulated (GASA4)         | Hormon induced/related | 2778                     | 3778                   | 1,36   | 136,0                    | 0,01    |
| AT3G44310 | GeneID:823556  | NI1                                   | Auxin-Biosynthese      | 7552                     | 9348                   | 1,24   | 124,0                    | 0,022   |
| AT4G24620 | GeneID:828564  | Phosphoglucose isomerase              | Asc-biosynthesis       | 5388                     | 4293                   | -1,26  | 79,4                     | 0,022   |
| AT4G14560 | GeneID:827103  | auxin induced gene (IAA1)             | Hormon induced/related | 3725                     | 2836                   | -1,31  | 76,3                     | 0,033   |

**Supplemental Table 1: Significantly regulated transcripts in leaves of 7 week old *sir1-1* plants**

The table represents significantly up- (white) and down-regulated (red) transcript levels in leaves of *sir1-1* in comparison to the wild type (Col-0). MIPS code (unique identifier of genes in *Arabidopsis thaliana*), NCBI GeneID (unique identifier of cDNAs), Identity, description (common name or function of gene product), Category (classification in metabolic network), median fitted data (raw data sets), Change (difference in transcript level in x-fold of wild type), Change in % of wild type (difference in transcript level in percent of wild type), P-value (indicator of statistical significance determined by M-CHiPS).



### **Supplemental Methods: Processing of microarray data**

Signal intensities were normalized by loglinear regression as described [1]. All hybridizations showed correlation coefficients higher than 0.8 between the two channels. The normalized data were used to compute P-values via the limma package [1]. In limma, a contrast matrix defines the comparisons of interest between samples in the experiment. We used a complete pairwise-comparisons contrast matrix to test differential expression across all samples.

Regression coefficients were estimated using a least squares linear model fitting procedure and tested for differential expression with moderated Student's t-statistic via the empirical Bayesian statistics described in the limma package. P-values computed for the *F-statistic* [2] were adjusted for multiple testing to control the FDR at 5% [3]. The adjusted p-values can serve to accept or reject the nullhypothesis based on a significance level. We selected genes showing intensity levels of more than 1000 in at least one of the conditions and also exhibit p-values smaller than 0.05.

[1] Fellenberg, K., Hauser, N.C., Brors, B., Neutzner, A., Hoheisel, J.D., Vingron, M. (2001). Correspondence analysis applied to microarray data. Proc. Natl. Acad. Sci. USA. **98**(19): 10781-10786

[2] Smyth, G.K. (2004) Linear models and empirical bayes methods for assessing differential expression in microarray experiments, Stat Appl Genet Mol Biol, 3, Article3

[3] Benjamini, Y. & Hochberg, Y. (1995). Controlling the false discovery rate: a practical and powerful approach to multiple testing. J. R. Stat. Soc. Ser. B, 1995, **57**: 289–300
